# Supplementary material for: Charging, aggregation, and electrostatic dispersion of radioactive and nonradioactive particles in the atmosphere
Source: Copernicus journal article supplement (doi:10.5194/ar-2-329-2024), 2024-12-06
Supplement: Supplementary file 1 [file ar-2-329-2024-supplement.pdf]

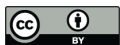

*Supplement of*

## **Charging, aggregation, and electrostatic dispersion of radioactive and nonradioactive particles in the atmosphere**

**Yong-Ha Kim et al.**

*Correspondence to:* Yong-Ha Kim (yonghakim1@lsu.edu)

The copyright of individual parts of the supplement might differ from the article licence.

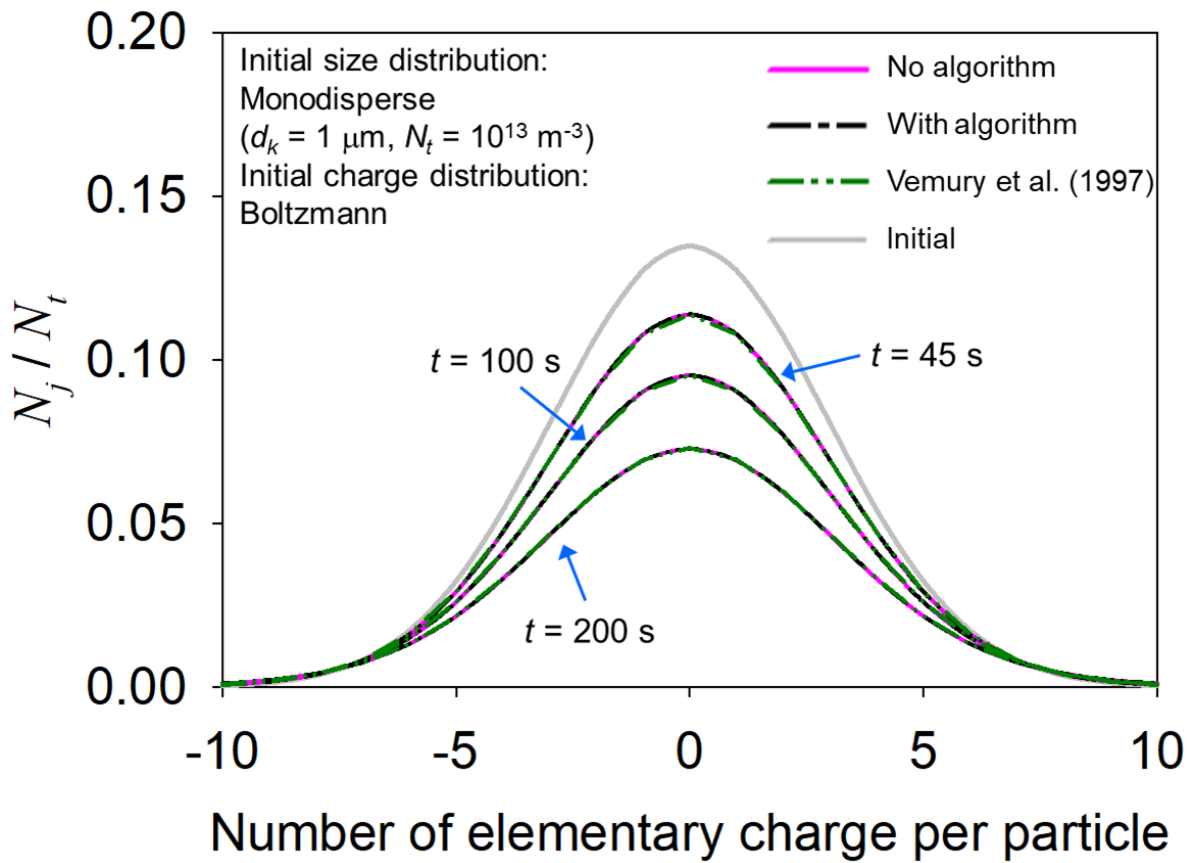

Figure S1. Time-dependent changes in the particle charge distributions predicted using the bivariate PBM including and excluding the algorithm of Fig. 2, respectively. The simulation results obtained from solving Eq. 4 were in good agreement with those of Vemury et al. (1997).

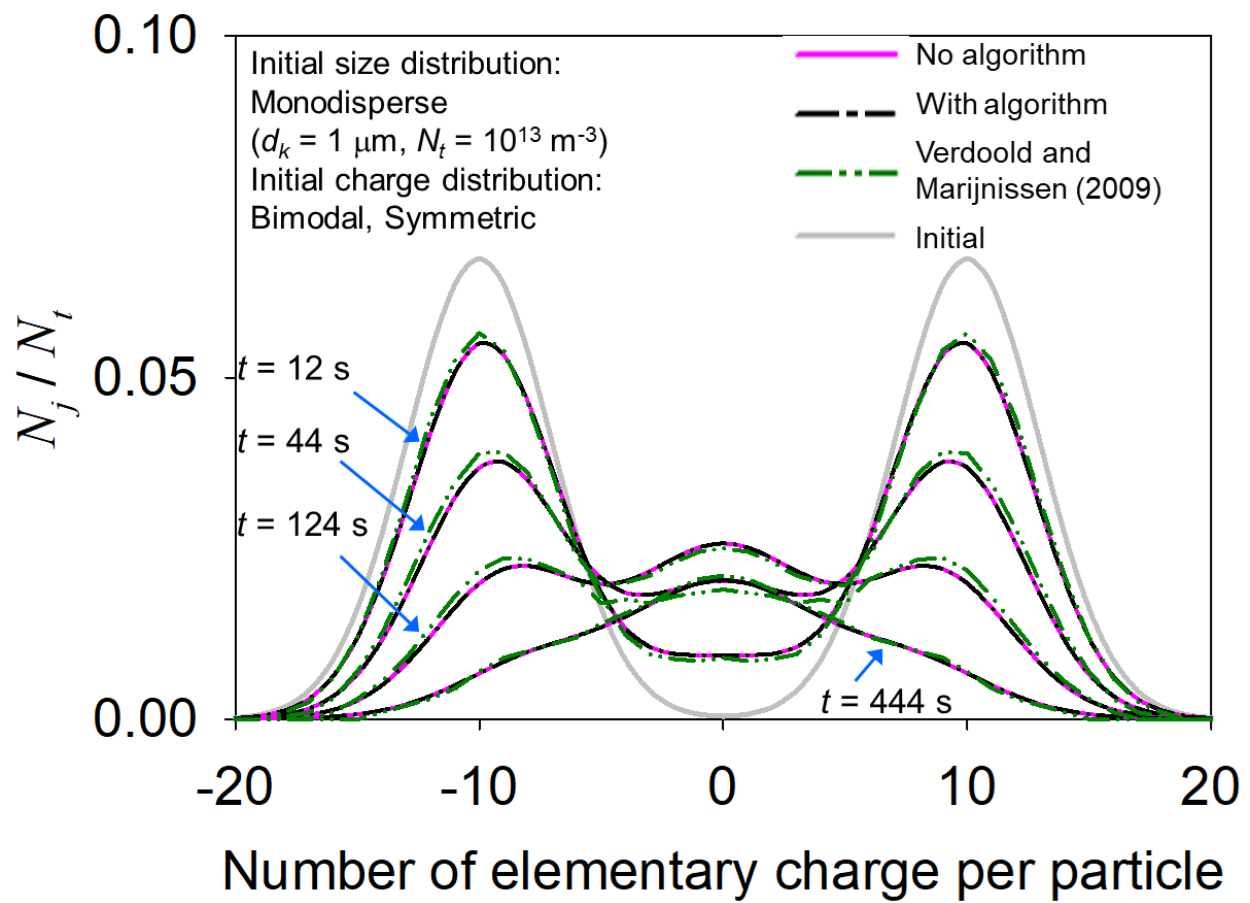

Figure S2. Time-dependent changes in the particle charge distributions predicted using the bivariate PBM including and excluding the algorithm of Fig. 2, respectively. The simulation results obtained from solving Eq. 4 were in good agreement with those of Verdoold and Marijnissen (2009).

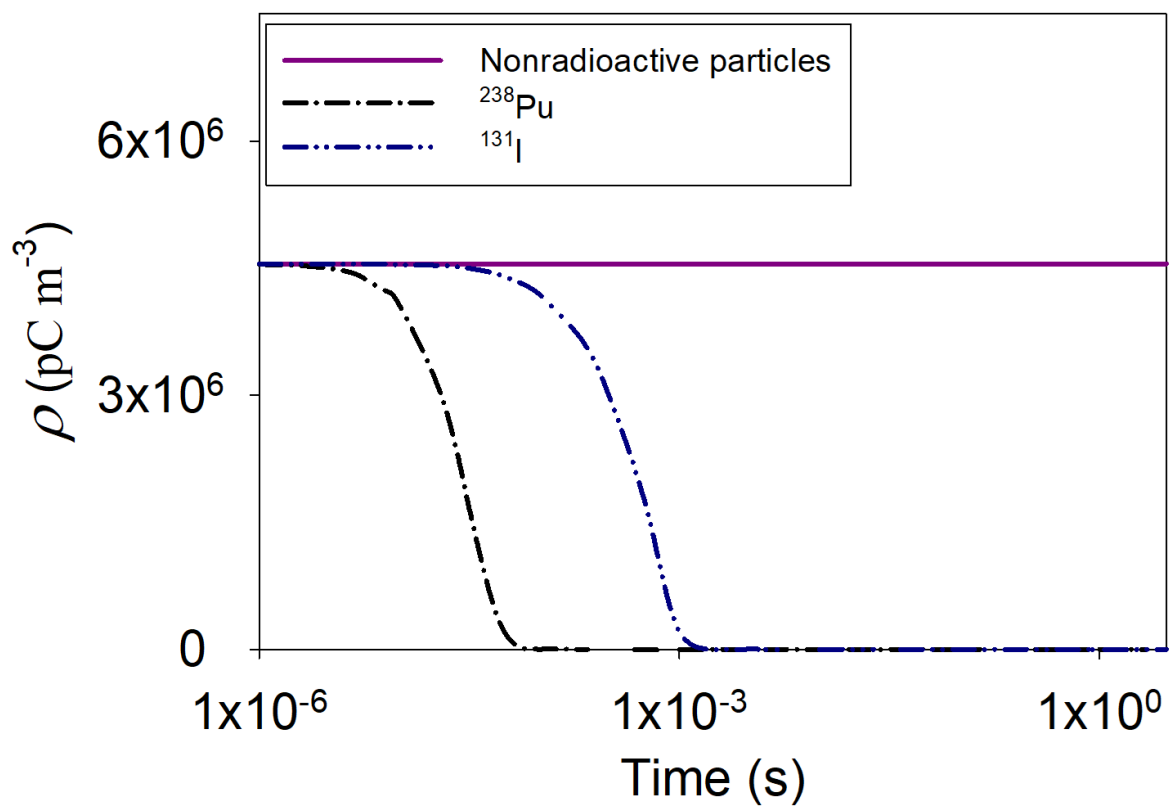

Figure S3. Changes in space charge at an early stage of the charging, aggregation, and electrostatic dispersion of radioactive and nonradioactive particles.
